# Supplementary material for: Psoriatic T cells recognize neolipid antigens generated by mast cell phospholipase delivered by exosomes and presented by CD1a
Source: PubMed Central journal article supplement — J Exp Med. 2016 Oct 17;213(11):2399–412. doi: 10.1084/jem.20160258 (PMC5068234; doi:10.1084/jem.20160258), 2016-10-17
Supplement: JEM_20160258_sm.pdf [file JEM_20160258_sm.pdf]

SUPPLEMENTAL MATERIAL

Cheung et al., <http://dx.doi.org/10.1084/jem.20160258>

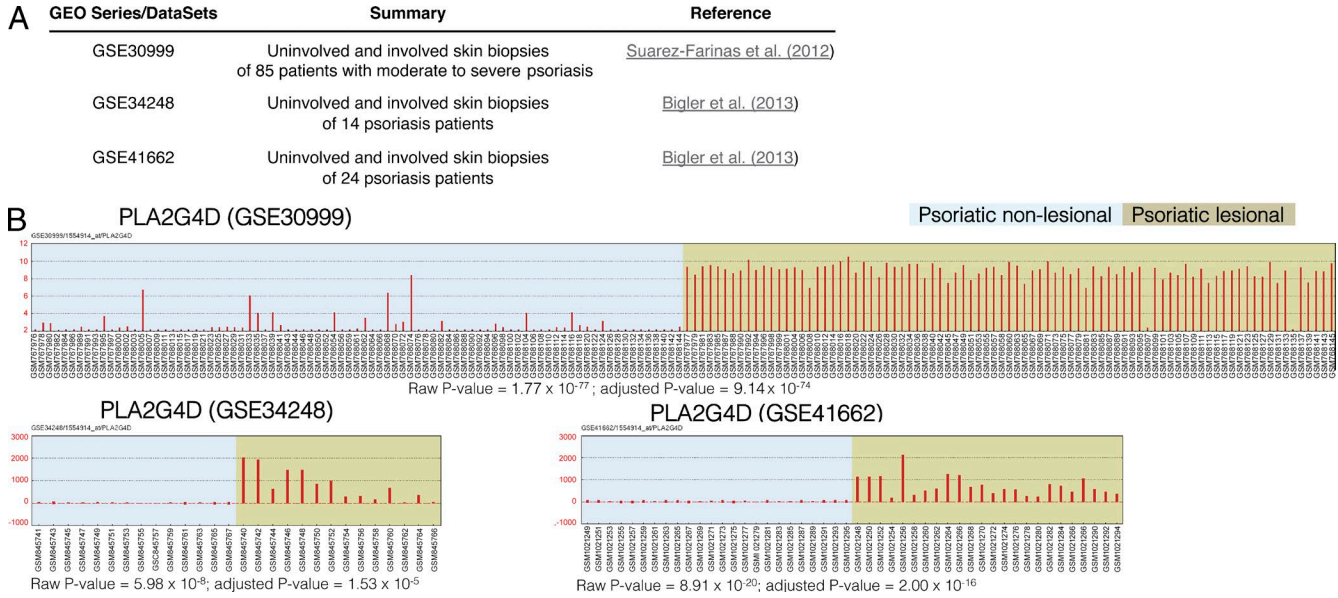

Figure S1. **GEO shows elevated PLA2G4D gene expression in psoriatic skin.** (A and B) Datasets from three gene expression studies of skin biopsies from psoriasis patients were retrieved from GEO (A) and analyzed using GEO2R (B).

REFERENCES

Bigler, J., H.A. Rand, K. Kerkof, M. Timour, and C.B. Russell. 2013. Cross-study homogeneity of psoriasis gene expression in skin across a large expression range. *PLoS One*. 8:e52242. <http://dx.doi.org/10.1371/journal.pone.0052242>

Suárez-Fariñas, M., K. Li, J. Fuentes-Duculan, K. Hayden, C. Brodmerkel, and J.G. Krueger. 2012. Expanding the psoriasis disease profile: interrogation of the skin and serum of patients with moderate-to-severe psoriasis. *J. Invest. Dermatol.* 132:2552–2564. <http://dx.doi.org/10.1038/jid.2012.184>
